# Supplementary material
Source: publisher site journal article supplement (https://static.cambridge.org/content/id/urn:cambridge.org:id:article:S0016756819000554/resource/name/S0016756819000554supp001.xlsx)
Supplement: Supplementary file 1 [file S0016756819000554supp001.xlsx]

## Sheet: Sheet1
Geological Magazine Links between iron supply from Asian dust and marine productivity in the Japan Sea since four million years ago LINA ZHAI, SHIMING WAN, RYUJI TADA, DEBO ZHAO, XUEFA SHI, XUEBO YIN, YANG TAN & ANCHUN LI Supplementary Material
Table S1 Concentrations of selected major elements (%), trace elements (ppm), total organic carbon (TOC) (%), total carbon (TC) (%) and CaCO3 (%) for the sediments from IODP Site U1430 in the Japan Sea.
Number	Age(Ma)	Al2O3	Fe2O3	TiO2	Cu	Ni	Ba	Mo	U	TOC	TC	CaCO3
1	0.002	14.1337	4.79652	0.564854	40.4519	42.8224	710.621	2.22835	3.12015	1.3058	2.14764	7.01537
2	0.023	13.8228	4.55157	0.607085	51.1891	44.1142	738.09	7.46138	5.39176	2.2352	3.41097	9.7981
3	0.043	15.7351	5.40088	0.658242	39.557	38.1745	788.879	3.47719	3.53433	0.877037	1.04932	1.43568
4	0.053	12.1805	4.90994	0.546791	41.2495	39.4499	649.744	5.91203	5.119	1.72279	3.74188	16.8258
5	0.058	14.4738	5.54869	0.662079	36.4159	40.1276	646.49	5.59845	4.39072	0.642525	1.77213	9.41336
6	0.063	13.9086	5.11686	0.5945	53.6085	42.0607	709.365	10.4631	6.89457	2.25612	3.59076	11.122
7	0.068	14.3518	5.1571	0.645719	40.8846	43.8413	785.087	11.9106	5.46729	2.53937	3.25361	5.95208
8	0.072	13.151	4.6417	0.503521	48.1385	47.5951	880.543	5.28128	6.98565	1.42853	2.41602	8.22909
9	0.072	12.9095	4.83185	0.493489	47.5323	48.2677	896.824	5.48798	7.84408	1.30078	2.62983	11.0754
10	0.077	14.4963	5.7139	0.659709	41.1615	40.6592	730.523	34.7331	5.88359	0.784526	1.4393	5.45648
11	0.077	14.1935	5.45691	0.663132	40.9057	42.2076	708.911	27.6697	5.75581	0.627847	1.46563	6.98154
12	0.079	15.4502	5.89489	0.721839	40.3471	61.1158	675.991	2.47086	3.50051	0.497954	0.763808	2.21545
13	0.081	14.954	5.3177	0.659637	40.9193	38.3406	727.346	9.91804	6.24954	1.08752	1.8738	6.55237
14	0.081	15.5624	5.72505	0.726079	47.5404	45.7727	961.985	4.14411	5.0782	0.968976	1.21492	2.04954
15	0.083	15.9951	5.77979	0.726374	51.5397	41.1102	557.446	7.68542	5.21657	1.04166	1.25939	1.81447
16	0.086	15.2347	5.04812	0.714578	48.8452	43.5946	602.217	10.0423	6.62117	1.89091	2.11147	1.838
17	0.114	14.8667	5.29815	0.702812	37.149	39.3458	571.04	4.28195	5.12868	0.84909	1.28574	3.63879
18	0.141	15.4251	5.80936	0.67419	45.7654	40.035	839.097	5.76224	5.0371	1.25639	1.90626	5.41555
19	0.169	15.0755	5.5666	0.621549	48.8917	43.1193	900.279	6.85685	5.91342	2.0991	2.31819	1.82574
20	0.197	16.1189	4.9183	0.579266	51.4313	35.51	608.519	6.60709	5.73119	1.89686	2.01031	0.945415
21	0.205	15.073	5.05403	0.630621	56.9309	43.3674	576.493	9.55262	5.37557	1.9434	2.57021	5.22343
22	0.224	13.8869	4.6078	0.525141	31.7613	28.7663	565.554	4.12825	4.14454	1.16134	2.37117	10.0819
23	0.232	14.2399	4.59091	0.544418	38.8714	33.1219	722.997	4.14303	4.71021	0.957798	1.72609	6.40243
24	0.26	15.4683	6.88167	0.688899	48.5231	47.5629	1070.26	5.91333	4.75509	0.907763	1.04258	1.12346
25	0.287	13.9247	4.79789	0.516986	33.3572	32.7706	713.844	10.4161	4.34885	0.926017	1.44836	4.35289
26	0.29	15.8398	5.14309	0.617598	27.2316	32.2937	569.672	4.69911	4.5815	0.789931	1.15261	3.02234
27	0.294	15.2283	5.27276	0.696853	42.0983	39.7972	798.265	9.33119	5.35152	0.535586	0.559254	0.197234
28	0.295	14.8557	5.94748	0.668366	41.78	46.2381	799.667	16.9784	5.16338	0.611394	0.656791	0.378309
29	0.302	16.1071	5.80217	0.673408	56.4459	47.3949	946.833	8.63118	6.91256	1.48496	1.60796	1.02492
30	0.339	7.95083	2.72917	0.315973	35.6014	29.2754	581.589	19.2363	11.2388	0.920724	6.92449	50.0314
31	0.377	14.0312	4.86471	0.597047	57.4716	43.694	693.511	7.73277	3.76743	1.95083	3.33909	11.5688
32	0.415	13.6948	3.76118	0.496385	60.6804	48.7056	1668.05	19.7473	11.6407	4.83	5.67835	7.05437
33	0.455	13.5734	4.52444	0.580032	45.0747	37.7108	710.378	8.07337	5.31342	1.56883	3.12242	12.9466
34	0.49	10.4216	3.59612	0.465244	30.9492	31.7551	456.344	7.32409	5.6696	0.785213	5.14756	36.3529
35	0.522	11.5949	3.90409	0.518138	37.3348	31.6511	596.424	15.7461	6.63651	1.00503	4.11932	25.9524
36	0.528	9.02286	3.26969	0.379273	45.8446	36.3718	918.397	39.3961	12.4862	2.24915	6.90016	38.7585
37	0.554	14.1374	4.47131	0.599769	42.6432	39.3871	974.185	12.7224	6.08636	2.2156	3.28203	8.88695
38	0.586	14.8149	5.12199	0.64081	34.3411	32.3685	642.341	16.6093	5.65391	0.702939	0.705922	0.0248541
39	0.592	13.5429	6.06353	0.621206	32.8308	45.2234	536.889	25.7323	6.67602	0.703387	0.767368	0.533176
40	0.624	14.5123	5.68449	0.634673	40.0238	37.3403	786.01	74.9439	9.36052	1.36724	1.51709	1.24873
41	0.629	13.7392	4.96999	0.592224	42.6055	39.0426	981.656	51.489	12.9567	1.87515	3.06405	9.90747
42	0.662	13.0937	4.63797	0.571848	41.8706	36.2361	752.774	7.11823	5.01738	0.863319	3.43676	21.4453
43	0.7	13.9315	4.86469	0.643458	40.485	40.7034	649.443	6.25951	5.25705	0.885036	2.65452	14.7457
44	0.726	14.0247	4.33702	0.535753	33.3484	25.6101	627.373	6.79003	4.64519	1.01622	2.59238	13.1347
45	0.753	16.0529	5.32943	0.643338	37.9557	28.694	639.173	9.8952	5.01588	0.610084	0.635308	0.210206
46	0.786	15.1932	5.86561	0.681579	46.5284	38.1359	1226.32	2.34378	3.67745	0.757938	1.31803	4.66745
47	0.824	12.036	4.24626	0.48543	61.3292	46.4699	1421.01	81.7567	17.473	2.18068	4.94266	23.0165
48	0.839	11.4271	3.74436	0.474989	40.8629	29.0746	1022.79	13.2512	5.66153	1.11977	4.39163	27.2655
49	0.872	12.7523	4.52103	0.591106	37.5353	34.3679	608.521	14.2705	4.93859	0.955993	3.34566	19.9139
50	0.885	15.3266	4.56458	0.58269	39.002	31.8285	654.919	10.1574	5.36167	1.3667	2.19613	6.91197
51	0.934	15.4015	4.77203	0.628474	47.6205	39.7705	1351.66	8.59765	6.52611	0.912505	1.77146	7.15795
52	0.982	14.852	4.88109	0.683722	59.1636	51.2411	1156.53	15.8475	13.4541	2.66286	3.06982	3.39136
53	0.998	14.9329	5.56277	0.720265	57.5413	49.783	1313.47	24.8115	11.7064	1.8752	2.07811	1.69089
54	1.031	15.1497	6.12347	0.680849	65.6245	47.7749	1340.15	27.4038	10.045	2.08198	2.26305	1.50895
55	1.047	15.0476	5.31832	0.65082	48.0509	38.6547	1220.71	15.5552	7.98222	2.09488	2.39063	2.4646
56	1.095	13.5664	4.72282	0.642572	34.7731	35.901	1041.84	7.04442	8.03964	0.800615	2.90117	17.5047
57	1.143	12.7927	4.46423	0.611903	44.4461	38.2492	859.03	16.0856	6.9135	1.42911	3.94315	20.9503
58	1.191	12.5957	4.2556	0.564302	35.2805	32.6897	777.658	7.30247	7.88654	0.97429	3.94104	24.7229
59	1.235	16.1671	4.97689	0.542556	32.6836	30.8271	1295.91	11.8217	8.72644	0.87169	1.00176	1.08392
60	1.279	15.3994	4.9093	0.650765	37.8145	31.5447	587.325	11.8568	8.21188	0.595449	1.60033	8.37399
61	1.322	16.479	4.84372	0.673684	35.3635	31.3615	1013.31	5.79459	7.10047	0.67436	1.03869	3.0361
62	1.366	15.3905	4.85669	0.661174	34.8472	31.2605	592.754	3.68517	6.07088	0.600337	1.34192	6.17986
63	1.37	16.0134	5.49005	0.651692	42.2724	37.5189	683.99	4.22538	6.4825	0.860326	1.30295	3.68858
64	1.401	13.7071	4.67238	0.654354	39.3947	38.1007	608.907	4.82738	7.29888	0.863678	2.66028	14.9717
65	1.413	14.5677	4.42429	0.680115	37.2798	33.4719	604.66	1.6868	5.05848	0.765184	2.1977	11.9376
66	1.432	15.7965	5.13399	0.674885	29.8907	25.9637	837.643	5.994	5.06808	0.650883	0.822415	1.42943
67	1.466	15.3975	4.92683	0.747504	46.2776	40.8919	750.513	1.41237	4.32563	0.458547	1.32405	7.21252
68	1.5	13.5967	5.04131	0.685102	40.3094	44.8416	1193.62	6.67387	9.26783	0.72852	2.54064	15.101
69	1.601	13.0969	4.38312	0.712127	40.0569	36.3739	1122.94	11.8449	8.30083	0.956376	2.77035	15.1165
70	1.701	9.85914	4.19186	0.54488	30.0098	31.8348	821.096	5.26526	4.16609	0.882862	3.8834	25.0045
71	1.8	13.0596	4.49028	0.716899	34.4951	36.0036	587.523	1.92522	4.53744	0.558994	2.69064	17.7637
72	1.9	13.3378	4.18819	0.609917	31.7961	31.8964	638.675	3.86291	5.64552	0.759855	2.09631	11.1371
73	1.915	14.3286	4.90395	0.725336	42.1377	42.6471	758.49	2.79611	5.5124	0.741431	1.07671	2.79401
74	1.999	11.2698	4.16837	0.548891	54.8362	49.03	1719.12	7.661	8.27485	1.29335	1.48636	1.60842
75	2.185	13.7509	5.23594	0.695357	47.9978	43.0769	1240.81	12.1106	7.91765	0.914784	0.993901	0.659314
76	2.233	16.2495	5.83161	0.760284	73.2757	58.1057	1121.43	11.8461	9.44539	1.27355	1.45709	1.52951
77	2.373	13.6126	3.80048	0.448765	41.634	30.6297	957.536	7.17991	5.25763	0.800566	0.910364	0.914984
78	2.402	14.2409	5.05167	0.681449	79.6924	55.6471	1501.25	8.85644	7.63148	1.68508	1.95055	2.21224
79	2.535	12.8629	5.23457	0.648708	84.6308	62.9906	2744.54	14.9754	8.35952	1.78308	2.13766	2.95481
80	2.667	14.6902	5.04081	0.729599	59.0142	49.2124	1119.63	5.48174	6.81199	0.857874	0.97759	0.997632
81	2.696	11.4124	4.25654	0.603605	42.6948	36.9763	1831.89	7.78211	4.80788	0.790961	0.792267	0.0108834
82	2.754	14.7764	5.6321	0.765864	66.558	50.6555	1061.85	10.3308	6.30077	1.03579	1.09355	0.481347
83	2.77	14.8763	5.82279	0.707393	69.6714	52.1018	1197.01	12.0198	6.54896	1.66292	1.68999	0.225632
84	2.842	9.94856	4.3295	0.469713	84.0559	50.8698	2005.5	13.3904	5.64652	2.05564	2.11125	0.463436
85	2.94	5.87886	2.12775	0.297208	30.7607	23.3999	1237.32	3.59659	3.7936	0.765084	0.766847	0.0146901
86	3.078	12.1248	4.48187	0.655242	52.4477	41.3367	1173.28	7.77582	5.92875	1.16687	1.19047	0.196629
87	3.217	10.8102	3.27767	0.549835	43.4693	31.2667	1514.87	4.97137	5.47269	1.06501	1.07573	0.0892915
88	3.355	4.6736	2.53497	0.213718	31.6283	26.1099	1345.56	7.19328	4.44099	0.923676	0.976166	0.437411
89	3.493	6.09635	2.15913	0.246568	32.014	22.8816	1581.43	3.62439	3.74896	0.901725	0.916541	0.12347
90	3.535	5.85779	2.36893	0.287499	25.3656	21.7798	1282.49	3.72308	3.6138	0.630699	0.63962	0.0743415
91	3.632	9.91071	3.47094	0.45216	47.197	40.1749	1704.05	3.1645	5.17974	1.24555	1.28469	0.326168
92	3.676	10.8376	4.2251	0.479358	45.7504	41.2514	1561.48	3.77601	5.72805	1.08273	1.0987	0.133041
93	3.854	7.11279	2.66094	0.317037	31.1925	34.1945	1076.27	2.52993	4.05632	0.58719	0.600762	0.113102
94	4.032	11.9368	3.88521	0.563381	41.6287	46.7386	1062.23	1.36244	5.61509	0.59446	0.599538	0.042313
